# Supplementary material
Source: PubMed Central journal article supplement (PMC7781007)
Supplement: rcmb.2020-0308LE_du_data_supplement.pdf [file rcmb.2020-0308LE_du_data_supplement.pdf]

# **Online Data Supplement**

**Lung Gene Expression Analysis (LGEA) Web Portal v3: Lung at a Glance**

Yina Du, Weichen Ouyang, Joseph A Kitzmiller, Minzhe Guo, Shuyang Zhao, Jeffrey A Whitsett  
and Yan Xu

## Appendix 1

### LGEA web portal feature panels and tools

<https://research.cchmc.org/pbge/lunggens/mainportal.html>)

| <b>LGEA functional panels and tools</b> | <b>Description</b>                                                                                                                                                                                                                                                                                                         | <b>Link</b>                                                                                                                     |
|-----------------------------------------|----------------------------------------------------------------------------------------------------------------------------------------------------------------------------------------------------------------------------------------------------------------------------------------------------------------------------|---------------------------------------------------------------------------------------------------------------------------------|
| <b>LungGENS</b>                         | <b>LungGENS</b> (Lung Gene Expression iN Single-cell) provides query functions of lung single cell data. <b>LungGENS</b> provides two distinct query functions: “Query by gene” and “Query by cell type”.                                                                                                                  | <a href="https://research.cchmc.org/pbge/lunggens/mainportal.html">https://research.cchmc.org/pbge/lunggens/mainportal.html</a> |
| <b>LungSortedCells</b>                  | <b>LungSortedCells</b> provides analyzed gene expression patterns obtained from sorted cell populations from human and mouse lung.                                                                                                                                                                                         | <a href="https://research.cchmc.org/pbge/lunggens/mainportal.html">https://research.cchmc.org/pbge/lunggens/mainportal.html</a> |
| <b>LungDTC</b>                          | <b>LungDTC</b> (Lung Developmental Time Course) provides query functions of lung developmental time course data.                                                                                                                                                                                                           | <a href="https://research.cchmc.org/pbge/lunggens/mainportal.html">https://research.cchmc.org/pbge/lunggens/mainportal.html</a> |
| <b>LungDisease</b>                      | <b>LungDisease</b> provides query functions of lung single cell, sorted cell data, lung images from various lung diseases.                                                                                                                                                                                                 | <a href="https://research.cchmc.org/pbge/lunggens/mainportal.html">https://research.cchmc.org/pbge/lunggens/mainportal.html</a> |
| <b>LungEpigenetics</b>                  | <b>LungEpigenetics</b> displays lung epigenetic data from ENCODE in UCSC genome browser                                                                                                                                                                                                                                    | <a href="https://research.cchmc.org/pbge/lunggens/mainportal.html">https://research.cchmc.org/pbge/lunggens/mainportal.html</a> |
| <b>LungImage</b>                        | <b>LungImage</b> hosts a image collection consisting of >3000 images from immunofluorescence confocal microscopies, H&E staining, thick tissue PLISH and Second harmonic obtained from mouse/human development and disease lung samples.                                                                                   | <a href="https://research.cchmc.org/pbge/lunggens/mainportal.html">https://research.cchmc.org/pbge/lunggens/mainportal.html</a> |
| <b>LungProteomics</b>                   | <b>LungProteomics</b> provides protein-centered query functions for users to query a protein of interest or protein signatures of a given cell type.                                                                                                                                                                       | <a href="https://research.cchmc.org/pbge/lunggens/mainportal.html">https://research.cchmc.org/pbge/lunggens/mainportal.html</a> |
| <b>LGEA-Toolbox</b>                     | <b>LGEA-ToolBox</b> provides several web tools we developed for investigators to compare and integrate their own gene list of interest with LGEA datasets; for advanced users, we provide R-scripts for our single cell analytic pipelines. We also provide links to commonly used analytic tools from external resources. | <a href="https://research.cchmc.org/pbge/lunggens/mainportal.html">https://research.cchmc.org/pbge/lunggens/mainportal.html</a> |
| <b>LGEA-ProjectBased</b>                | <b>LGEA-ProjectBased</b> collected lung single cell data from our recent publications and other laboratories interested in having their data hosted on the LGEA web site.                                                                                                                                                  | <a href="https://research.cchmc.org/pbge/lunggens/mainportal.html">https://research.cchmc.org/pbge/lunggens/mainportal.html</a> |
| <b>LungOntology</b>                     | <b>LungOntology</b> is the latest released feature of LGEA embedded in the " <b>Lung at a glance</b> " toolset which bridges lung anatomic ontologies to lung image collection and lung gene expression in LGEA web portal.                                                                                                | <a href="https://research.cchmc.org/pbge/lunggens/mainportal.html">https://research.cchmc.org/pbge/lunggens/mainportal.html</a> |

|                                  |                                                                                                                                                                                                                                                                             |                                                                                                                                                     |
|----------------------------------|-----------------------------------------------------------------------------------------------------------------------------------------------------------------------------------------------------------------------------------------------------------------------------|-----------------------------------------------------------------------------------------------------------------------------------------------------|
| <b>LDProfiles</b>                | Lung Developmental Gene Expression Profiles ( <b>LDProfiles</b> ) provides gene query function using mouse lung developmental time course microarray data cross different mouse strains.                                                                                    | <a href="https://research.cchmc.org/pbge/ldprofiles.html">https://research.cchmc.org/pbge/ldprofiles.html</a>                                       |
| <b>Signatures comparison</b>     | <b>Signatures comparison</b> allows users to compare gene list against signatures genes, transcription factors, and surface markers in LGEA datasets.                                                                                                                       | <a href="https://research.cchmc.org/pbge/lunggens/tools/sigcomp.html">https://research.cchmc.org/pbge/lunggens/tools/sigcomp.html</a>               |
| <b>Gene list query</b>           | <b>Gene list query</b> allows users to type in or paste their own gene list of interest to explore the expression patterns of these genes across different cell types in LGEA database.                                                                                     | <a href="https://research.cchmc.org/pbge/lunggens/tools/genelist_query.html">https://research.cchmc.org/pbge/lunggens/tools/genelist_query.html</a> |
| <b>Gene Expression Dot Plot</b>  | <b>Gene Expression Dot Plot</b> allows users to analyze their own gene list of interest against any given dataset in LGEA. A dot plot will be generated to display the expression patterns of these genes cross different cell types and different lung development stages. | <a href="https://research.cchmc.org/pbge/lunggens/tools/data_retrieval.html">https://research.cchmc.org/pbge/lunggens/tools/data_retrieval.html</a> |
| <b>Lung at a glance</b>          | <b>Lung at a glance</b> is our newly developed toolset consisting three distinct but interactive components: 1) “Region at a glance”, 2) “Cell at a glance” and 3) “Gene at a glance”.                                                                                      | <a href="https://research.cchmc.org/pbge/lunggens/tools/lung_at_glance.html">https://research.cchmc.org/pbge/lunggens/tools/lung_at_glance.html</a> |
| <b>SINCERA</b>                   | A Computational Pipeline for Single Cell RNA-seq Profiling Analysis.                                                                                                                                                                                                        | <a href="https://research.cchmc.org/pbge/sincera.html">https://research.cchmc.org/pbge/sincera.html</a>                                             |
| <b>SLICE</b>                     | The <b>SLICE</b> (Single Cell Lineage Inference Using Cell Expression Similarity and Entropy): determining Cell Differentiation and Lineage based on Single Cell Entropy.                                                                                                   | <a href="https://research.cchmc.org/pbge/slice.html">https://research.cchmc.org/pbge/slice.html</a>                                                 |
| <b>Other research tools list</b> | We collect and provide links to commonly used analytic tools from external resources.                                                                                                                                                                                       | <a href="https://research.cchmc.org/pbge/lunggens/tools/tools_List.html">https://research.cchmc.org/pbge/lunggens/tools/tools_List.html</a>         |

## Appendix 2

### LGEA web portal tutorial list

<https://research.cchmc.org/pbge/lunggens/mainportal.html>

| Name                                                                                                     | Description                                                                                                                                                                                                                                                                                                      | Link                                                                                                                          |
|----------------------------------------------------------------------------------------------------------|------------------------------------------------------------------------------------------------------------------------------------------------------------------------------------------------------------------------------------------------------------------------------------------------------------------|-------------------------------------------------------------------------------------------------------------------------------|
| <b>Introduction of LungMAP</b> -- Dr. Jeffrey Whitsett                                                   | LungMAP project introduction                                                                                                                                                                                                                                                                                     | <a href="https://research.cchmc.org/pbge/lunggens/LGEA_help.html">https://research.cchmc.org/pbge/lunggens/LGEA_help.html</a> |
| <b>Introduction of LGEA Web Portal</b> -- Dr. Yan Xu                                                     | ATS Webinar Seires 2019 ( <a href="http://54.209.11.195/members/assemblies/sections/gg/journal-club/lungmap-part-1.php">http://54.209.11.195/members/assemblies/sections/gg/journal-club/lungmap-part-1.php</a> ). LGEA web portal introduction and usage of LGEA resouces.                                      | <a href="https://research.cchmc.org/pbge/lunggens/LGEA_help.html">https://research.cchmc.org/pbge/lunggens/LGEA_help.html</a> |
| <b>LGEA tutorial -- User Case 1</b><br>(Functional feature of Gene list query)                           | Users will explore the functional feature of “Gene list query” in LGEA toolbox using a set of genes from an analysis result to identify cell types that selectively express in our input gene list.                                                                                                              | <a href="https://research.cchmc.org/pbge/lunggens/LGEA_help.html">https://research.cchmc.org/pbge/lunggens/LGEA_help.html</a> |
| <b>LGEA tutorial -- User Case 2</b><br>(Functional feature of Cell at a glance)                          | Users want to compare gene sets in alveolar epithelial cells along with immunofluorescence images during lung development (E16.5 –PN28). In this user case. users will explore AT2 cells using our “Cell-at-a-glance” tool to find all the information related to AT2 cells including immunofluorescence images. | <a href="https://research.cchmc.org/pbge/lunggens/LGEA_help.html">https://research.cchmc.org/pbge/lunggens/LGEA_help.html</a> |
| <b>LGEA tutorial -- User Case 3</b><br>(Functional feature of "Region at a glance")                      | Users will explore the functional feature of “region-at-a-glance” to help users explore the region of interest and the cells within the region.                                                                                                                                                                  | <a href="https://research.cchmc.org/pbge/lunggens/LGEA_help.html">https://research.cchmc.org/pbge/lunggens/LGEA_help.html</a> |
| <b>LGEA tutorial -- User Case 4</b><br>(Functional feature of "Cell at a glance" and "Gene at a glance") | Users will explore the functional feature of the “Cell-at-a-glance” and “Gene-at-a-glance” to help users identify markers and images for endothelial cells during lung development.                                                                                                                              | <a href="https://research.cchmc.org/pbge/lunggens/LGEA_help.html">https://research.cchmc.org/pbge/lunggens/LGEA_help.html</a> |
| <b>LGEA tutorial -- User Case 5</b><br>(Functional feature of "Signatures comparison")                   | Users will explore the functional feature of “Signatures Comparison” in LGEA toolbox. Users can compare their gene list to cell type specific signatures in LGEA database, compare two gene lists from LGEA signatures database, and find transcription factors or surface markers in their gene list.           | <a href="https://research.cchmc.org/pbge/lunggens/LGEA_help.html">https://research.cchmc.org/pbge/lunggens/LGEA_help.html</a> |
| <b>LGEA tutorial -- Lung Image website</b>                                                               | Functional feature of Lung Image website                                                                                                                                                                                                                                                                         | <a href="https://research.cchmc.org/pbge/lunggens/LGEA_help.html">https://research.cchmc.org/pbge/lunggens/LGEA_help.html</a> |

|                                                                                  |                                                                                         |                                                                                                                                         |
|----------------------------------------------------------------------------------|-----------------------------------------------------------------------------------------|-----------------------------------------------------------------------------------------------------------------------------------------|
| <b>LGEA tutorial --<br/>Nikon Brightfield<br/>Microscope H&amp;E<br/>Imaging</b> | Settings for Nikon Brightfield Microscope and<br>Tile Scanning H&E Staining Human Lung. | <a href="https://research.cchmc.org/pbge/lunggens/LGEA_help.html">https://research.cchmc.org/<br/>pbge/lunggens/LGEA_help.<br/>html</a> |
|----------------------------------------------------------------------------------|-----------------------------------------------------------------------------------------|-----------------------------------------------------------------------------------------------------------------------------------------|
